# Supplementary material for: Oxidative Torrefaction of Sunflower Husk Pellets&nbsp;in the Kaolin Layer
Source: Research Square preprint supplement (doi:10.21203/rs.3.rs-274240/v1), 2021-03-04
Supplement: Supplementary file 1 [file a2a990198c832819692cba9f.xlsx]

## Sheet: Лист1
№	Sample	Ultimate analysis (wt.%, dry basis)				O/C	H/C	HHV, MJ/kg
		C	H	N	O
	untreated	47.3	6.5	0.95	42.33	0.67	1.65	18.94
1	S240-60-3	48.9	6.29	0.48	41.14	0.63	1.54	19.53
2	S240-60-4	48.3	6.09	0.55	42.14	0.65	1.51	19.22
3	S240-60-5	49.11	5.98	0.52	41.35	0.63	1.46	19.54
4	S260-30-3	48.18	6.18	0.93	40.1	0.64	1.54	19.25
5	S260-30-4	49.41	6.22	0.59	40.22	0.61	1.51	19.74
6	S260-30-5	49.01	6.26	0.48	40.69	0.62	1.53	19.57
7	S260-60-3	53.85	6.21	0.54	35.99	0.5	1.38	21.75
8	S260-60-4	52.54	6.24	0.27	37.6	0.54	1.42	21.11
9	S260-60-5	52.47	6.32	0.28	36.7	0.52	1.45	21.12
10	S280-30-3	47.8	6.09	0.55	41.94	0.66	1.53	19.02
11	S280-30-4	50.02	5.83	0.44	39.94	0.6	1.4	19.86
12	S280-30-5	50.53	6.41	0.2	39.28	0.58	1.52	20.25
13	S280-60-3	53.01	6.27	0.13	35.88	0.51	1.42	21.33
14	S280-60-4	54.43	6.37	0.24	34.66	0.48	1.4	22.06
15	S280-60-5	50.7	5.89	0.6	38.91	0.58	1.39	20.19
